1 **Distinct Long-term Effects of Precision X-Radiation on Reflex Saliva Flow Rate and**  
2 **Tissue Integrity in a Preclinical Model of Chronic Hyposalivation**

3 Syed Mohammed Musheer Aalam<sup>1,\*</sup>, Ishaq A. Viringipurampeer<sup>1,\*</sup>, Matthew C. Walb<sup>2,§</sup>, Erik J.  
4 Tryggestad<sup>2</sup>, Chitra P. Emperumal<sup>3</sup>, Jianning Song<sup>1</sup>, Xuewen Xu<sup>1</sup>, Rajan Saini<sup>4</sup>, Isabelle M.A.  
5 Lombaert<sup>5</sup>, Jann N. Sarkaria<sup>2</sup>, Joaquin Garcia<sup>1</sup>, Jeffrey R. Janus<sup>3,6,7</sup>, Nagarajan Kannan<sup>1,7,8,#</sup>

6 <sup>1</sup>Department of Laboratory Medicine and Pathology, Mayo Clinic, Rochester, Minnesota, USA

7 <sup>2</sup>Department of Radiation Oncology, Mayo Clinic, Rochester, Minnesota, USA

8 <sup>3</sup>Department of Otolaryngology-Head and Neck Surgery, Mayo Clinic, Rochester, Minnesota,  
9 USA

10 <sup>4</sup>Department of Oral Biological and Medical Sciences, Faculty of Dentistry, University of British  
11 Columbia, Vancouver, British Columbia, Canada

12 <sup>5</sup>Biointerfaces Institute, School of Dentistry, Department of Biologic and Materials Sciences,  
13 University of Michigan, Ann Arbor, Michigan, USA

14 <sup>6</sup>Department of Otolaryngology-Head and Neck Surgery, Mayo Clinic, Jacksonville, Florida,  
15 USA

16 <sup>7</sup>Center for Regenerative Medicine, Mayo Clinic, Rochester, Minnesota, USA

17 <sup>8</sup>Mayo Clinic Cancer Center, Mayo Clinic, Rochester, Minnesota, USA

18 <sup>§</sup>Current affiliation: Department of Radiation Oncology and Winship Cancer Institute, Emory  
19 University, Atlanta, GA 30322

20 <sup>\*</sup>These authors contributed equally

21 # Corresponding author: Nagarajan Kannan Ph.D.  
22 Head of Laboratory of Stem Cell and Cancer Biology  
23 Mayo Clinic  
24 200 First Street SW,  
25 Rochester, MN, 55905, USA  
26 Electronic mail: [Kannan.Nagarajan@mayo.edu](mailto:Kannan.Nagarajan@mayo.edu)

27 **Short title:** Preclinical Model of Radiation Induced Chronic Hyposalivation

28 **Keywords:** Xerostomia, Chronic Hyposalivation, X-Rad SmART Irradiator, Precision  
29 Radiotherapy, Radiation Injury, Radiation Side Effects, Quality of Life, Preclinical Model,  
30 Immunodeficient Mice, NSG-SGM3 Mice, Submandibular Gland, Parotid Gland, Sublingual  
31 Gland, Precision Radiation, Stereotactic Radiation, Saliva, Saliva Flow Rate, Schirmer's Test

32 **Abstract**

33 Chronic salivary hypofunction and xerostomia are common side effects of radiation therapy  
34 which is an essential component in the curative management in patients with head & neck  
35 cancers. Over the years, improvements in delivery techniques such as image-guided intensity  
36 modulated radiation therapy have led to improvement in cancer management but chronic  
37 hyposalivation continues to be a challenge that causes long-term health implications resulting in  
38 compromised quality of life. Recent advances in salivary stem cell research promise new  
39 frontier in the treatment of radiation-induced hyposalivation by initiating regeneration of  
40 radiation-damaged salivary parenchymal cells. Lack of a standard preclinical immunodeficient  
41 model to assess radiation-induced changes objectively and quantitatively in salivary flow rates  
42 will impede rapid progress towards the development of cellular therapies for chronic salivary  
43 dysfunction and attendant xerostomia. Herein, we report the first fully characterized novel cone-  
44 beam computed tomography (CBCT)-guided precision ionizing radiation (IR) induced chronic  
45 hyposalivation model in radiosensitive, immunodeficient transgenic NSG-SGM3 mice  
46 expressing three human cytokines including c-KIT ligand/stem cell factor. Additionally, we also  
47 report a novel and instantaneous method to objectively assess the kinetics of pilocarpine-  
48 stimulated salivary flowrate. Comprehensive structural and functional characterization of  
49 salivary glands revealed previously unknown and highly complex gender, age, IR dose and  
50 salivary gland subtype-specific effects of salivary-ablative precision IR.

51 **Introduction**

52 Head and neck cancer accounts for ~4% of all cancers in the United States (1). The current  
53 standard of care for management can involve surgery, radiation therapy, chemotherapy,  
54 targeted therapy or a combination of these treatment modalities depending on various factors  
55 including the stages of cancer, the surgical accessibility of the tumor, and morbidity associated  
56 with each modality (2). In nearly 70% of the patients undergoing radiation therapy due to  
57 location of many of these oral cancers, non-diseased adjacent tissues such as salivary  
58 parenchyma is irreparably damaged due to its high sensitivity to radiation. This often results in  
59 radiation-induced 'objective' hyposalivation or a 'subjective' clinical condition referred to as  
60 xerostomia or dry mouth (2, 3). Complications of long-term radiation induced hyposalivation  
61 include impaired taste, difficulties in speech, mastication and denture retention, increased risk of  
62 dental caries and an overall compromised quality-of-life (QOL) (4). Management of  
63 hyposalivation often involves the use of cholinergic drugs such as pilocarpine (5) or cevimeline  
64 (6). The effectiveness of these systemic sialagogues often depends on the presence of  
65 functionally-intact glandular tissue units (5). Recently, putative stem cells, that can restore the  
66 salivary gland functions upon orthotopic transplantation in radioablated salivary glands of  
67 recipient mice, have been reported in the submandibular glands of mice (7-9) and humans (10).  
68 To compare the quality and quantity of salivary regenerative units in transplant experiments, a  
69 standardized *in vivo* assay must be developed. However, there are several limitations with  
70 currently available models of hyposalivation. 1) Their derivation involves IR and there is no  
71 consensus on sources of IR, radiation fields, doses or treatment protocols. 2) A reliable method  
72 to measure kinetics of stimulated reflex saliva is lacking. 3) A comprehensive characterization of  
73 cellular components of radioablated salivary glands in an immunodeficient mouse model of  
74 chronic hyposalivation is lacking. 4) Human salivary stem cells are suggested to express c-KIT  
75 receptor, which interacts poorly with murine c-KIT ligand and therefore mouse models lacking  
76 the expression of human cKIT ligand may not fully support the engraftment of human salivary  
77 stem cells (10). These lacunae need to be addressed before such preclinical models could be  
78 routinely used for human salivary stem cell evaluation. Therefore, in the present study, based  
79 on comprehensively characterization of precision irradiated male and female (young and old)  
80 immunodeficient transgenic NSG-SGM3 mice expressing human c-KIT ligand, we have  
81 identified suitable models for chronic hyposalivation studies for preclinical assessment of  
82 experimental therapies. Further, we demonstrate Schirmer's test as an accurate, reliable  
83 method to assess quantitative changes in saliva flow rate in real time in our hyposalivation

84 model. Moreover, characterization of salivary glands at necropsy further revealed highly  
85 complex gender, age, IR dose and salivary gland subtype-specific effects of salivary-ablative  
86 precision IR in NSG-SGM3 mice. In summary, we have developed the first humanized mouse  
87 model that mimics a challenging, chronic lifestyle problem in cancer survivors, which provides a  
88 robust platform to enable studies to measure regenerative outcome following patient-derived  
89 salivary cell transplants.

## 90 **Results and Discussion**

91 To generate a preclinical model of chronic hyposalivation here in, we utilized 3D image guided  
92 stereotactic X-RAD SmART+small animal irradiator system (Precision X-ray Inc., North  
93 Bradford, CT) to radioablate the major salivary glands of immunodeficient NSG-SGM3  
94 (NOD.Cg- *Prkdc*<sup>scid</sup> *Il2rg*<sup>tm1Wjl</sup> Tg (CMV-IL3, CSF2, KITLG) mice (11). Details of the functionality  
95 of this irradiator are described elsewhere (12-14). Dosimetric calculations were performed with  
96 an in-house 1D “point dose calculator” (PDC) tool developed by our medical physics group to  
97 enable efficient dose calculations (single prescription reference point on the central beam axis)  
98 (15). This simple 1D PDC was verified using the vendor supplied 3D Monte Carlo treatment  
99 planning system, SmART-ATP version 1.1 (SmART Scientific Solutions B.V., Maastricht,  
100 Netherlands), which is based on the open-source Monte Carlo code (EGSnrc/BEAMnrc)(16, 17)  
101 (Fig1A&B). The chosen beam arrangement was parallel opposed beams using a 10 mm circular  
102 collimator, with tipped laterals (89° and 271°) aligned to match beam divergence along the brain  
103 edge in order to maximize brain sparing and achieve specific targeting of major salivary glands  
104 along the midline of the mouse in the neck region (Fig1C (i-iii)). The individual young (~21  
105 weeks) male or female or old (~53 weeks) female mouse was restrained on a bite block using  
106 an anesthesia nose cone and imaged with cone beam computed tomography (CBCT).  
107 Subsequently, CBCT image-guidance defined target and single radiation dose ranging from 0–  
108 7.5 Gy for young and old mice was delivered at target site i.e., major salivary glands. Both sham  
109 and precision IR treated mice were followed for 6 months. The young mice precision irradiated  
110 with 5 Gy showed transient alopecia whereas, higher dose of 7.5 Gy showed permanent  
111 alopecia in the mandibular region (Fig1D). However, we did not observe any significant change  
112 in body weight of young or old mice (Fig1E) throughout the study period or precision IR related  
113 mortality (Fig1F), which suggests that both male and female *Prkdc*<sup>scid</sup> mutant highly  
114 radiosensitive NSG-SGM3 mice are able to tolerate Sub-lethal dose is 3.5 Gy (18) of IR when  
115 delivered in a stereotactic manner on the major glands.

116 Salivary stimulation and secretion is a nerve-mediated reflex action modulated by the central  
117 nervous system in response to a stimulus, and this activity is an important indicator of functional  
118 health of salivary glands (19). In hyposalivation animal models, cholinergic drugs such as  
119 pilocarpine or carbachol are often used to stimulate saliva secretion (10, 20, 21). Although,  
120 there are several methods that have been reported to collect stimulated reflex saliva and  
121 evaluate changes in salivary flow rate in vivo or ex vivo (Supplementary table1), the field lacks  
122 an operator independent and objective method for instantaneous kinetic measurement of  
123 stimulated saliva flowrate in vivo. Therefore, we adopted Schirmer's test strip method to assess  
124 quantitative changes in salivary flow rate in NSG-SGM3 mice. Schirmer's tests are used in  
125 clinical practice to measure eye dryness (22). We tested this method against the most  
126 commonly used gravimetric method. We injected 2 mg/kg of pilocarpine sub-cutaneously  
127 (SubQ) into the dorsal flanks of mice and started continuously collecting saliva 5 minutes post-  
128 injection from the floor of mouth using pre-weighed filter paper or Schirmer's test strips for 30  
129 minutes. The filter paper or Schirmer's test strips were changed every five minutes and saliva  
130 migration under the capillary action (mm) was recorded. Subsequently, weight of blotted strips  
131 was determined gravimetrically (Fig2A). Schirmer's test demonstrated gender-specific and age-  
132 specific differences in stimulated reflex saliva flow rate captured over 30 minutes. The saliva  
133 secretion peaks at 10 minutes after stimulation in all mice irrespective of gender, age or  
134 radiation treatment and declines thereafter (Fig2B). Sexual dimorphism was reported in  
135 submandibular gland (SMG) in mouse models with respect to the unique presence of granular  
136 convoluted tubular structures in male mice (23). We found such structures in SMG of male  
137 NSG-SGM3 only (Supplementary Fig 1). Additionally, Schirmer's test distinguished young  
138 female mice having significantly lower initial stimulated saliva flowrates compared to young male  
139 and old female mice at -1 weeks and +3 weeks of sham-irradiation (Fig2B). Notably, the old  
140 female mice exhibited relatively more rapid secretory loss after 10 min (Fig2B). This trend was  
141 consistent during the 6-7 month measurement period in sham irradiated mice. Furthermore,  
142 various measurements of saliva fraction over the period of 24 weeks in young male and female  
143 mice demonstrated that our Schirmer's test strip method was highly correlated with gravimetric  
144 method in both male ( $R^2=0.9031$ ,  $p<0.0001$ ) and female ( $R^2=0.7289$ ,  $p<0.0001$ ) NSG-SGM3  
145 mice (Fig2D). Taken together, our results suggest that Schirmer's test strips offer a, rapid and  
146 reliable quantitative method to assess real-time change in saliva flow rate in mice. This method  
147 can be easily adapted to study saliva flow rate in other mouse strains and species. Moreover,  
148 Schirmer's test strips circumvent the variability associated with salivary collection and  
149 measurement methods. In fact, in our study the saliva measurement with Schirmer's test strips

150 was found to be consistent between three independent operators (data not shown). Salivary  
151 gland hypofunction resulting in chronic hyposalivation is often one of the consequences  
152 associated with radiotherapy of head and neck malignancies. Patients with such complications  
153 experience QOL or oral health issues (4). Modeling chronic radiation-induced hyposalivation in  
154 animals has been challenging, as there is no consensus on radiation dose, gender, age and  
155 duration of the study period. Therefore, we systematically characterized stereotactic radiation  
156 dose-dependent chronic reflex hyposalivation in preclinical NSG-SGM3 model. We determined  
157 the kinetics of pilocarpine stimulated reflex saliva flow rates over the course of 30 minutes using  
158 Schirmer's test strips in young male, female and old female mice irradiated with 0, 2.5, 5 and  
159 7.5 Gy doses. At 24 weeks post-irradiation, we observed significant delay in the onset of  
160 stimulated reflex saliva secretion and reduction in salivary flowrates in mice irradiated with  
161 radiation doses of 5 and 7.5 Gy compared to 0 Gy controls (Fig3A). However, mice irradiated  
162 with 2.5 Gy dose showed a marginal decline in stimulated reflex saliva flowrate compared to 0  
163 Gy controls in young male and female mice (Fig3A). Moreover, at early time points (5 and 10  
164 min) following pilocarpine stimulation, salivary flow rate is significantly different between young  
165 male and female mice at the high doses (5 and/or 7.5 Gy) (pvalue < 0.0055 and 0.0023)  
166 (Fig3B). Further, to assess chronic hyposalivation in our pre-clinical NSG-SGM3 model, we  
167 continued the measurement of stimulated reflex saliva flow rate until a period of 6 months post-  
168 irradiation. We observed marked reduction in stimulated reflex saliva fraction immediately  
169 following irradiation in young male, young female and old female mice. After 2 months post-  
170 irradiation with 5 and 7.5 Gy doses, the stimulated reflex saliva flow rate stabilized at 50% and  
171 was sustained until the endpoint of 6 months relative to 0 Gy controls (Fig3C&D). Interestingly,  
172 mice irradiated with 2.5 Gy dose showed initial decline in stimulated reflex saliva flow rate, but  
173 this was followed by restoration as early as 3 weeks after irradiation although not to the extent  
174 similar to that of 0 Gy controls (Fig3C&D). This restoration of salivary flowrate could be partially  
175 attributed to ongoing salivary stem cell activity that may contribute to functional recovery of the  
176 gland. Interestingly, starting at 2 months (+6 week and +24 week post-IR), the fraction of saliva  
177 in young females was significantly lower compared to young male mice (Fig3D).

178 Radiation-induced salivary gland injury is also associated with glandular shrinkage, loss of  
179 acinar cell area, inflammation, fibrosis, microvascular injury and atrophy (24). Therefore, at the  
180 endpoint of 24 weeks, we sacrificed sham and irradiated mice and performed neck dissection to  
181 harvest salivary gland tissue. Overall the sham-irradiated whole salivary glands were  
182 significantly larger in old female mice than young female mice relative to their body weight



183 (Fig4A). At necropsy, we observed glandular shrinkage irrespective of gender and age in  
184 cohorts of mice irradiated with 5 and 7.5 Gy doses albeit glandular shrinkage was not evident  
185 with 2.5 Gy dose in comparison to 0 Gy controls (Fig4B-C). Consistently, we observed  
186 significant dose dependent reduction in salivary gland weight in young and old female mice  
187 (Fig4C). Interestingly, we did not observe any correlation between radiation doses and salivary  
188 gland weight in young male mice due to variability across the radiation doses (Fig4C). Further,  
189 we prepared tissue sections from harvested parotid, submandibular and sublingual glands of  
190 young female mice irradiated with 0 and 7.5 Gy doses and performed histological and  
191 immunohistochemical analysis. Hematoxlin and Eosin (H&E) staining revealed gross changes in  
192 tissue morphology and loss of acinar and ductal cells in all major salivary glands of irradiated  
193 mice when compared to controls (Fig4D-i). Similarly, Sirius red (Fig4D-ii) and trichrome (Fig4D-  
194 iii) staining showed thickening of collagen fibers and fibrosis in tissue sections obtained from  
195 irradiated mice when compared to controls. Moreover, to assess the extent of radiation induced  
196 damage to salivary epithelium, we stained whole salivary tissue sections for epithelial cell  
197 marker EpCAM by immunostaining (25). We observed reduced expression of EpCAM in salivary  
198 epithelium of irradiated mice compared to controls, which could be attributed to the loss of  
199 functional ducts and acini (Fig4D-iv). To validate this observation we performed immunostaining  
200 for Aquaporin 5 (Aqp5), a membrane protein that facilitates water movement across the  
201 basal/lateral/ apical membrane in acinar cells (26). Consistently, our results revealed reduction  
202 in expression of Aqp5 in acinar cells of irradiated mice compared to controls (Fig4D-v).  
203 Interestingly, we observed higher expression of  $\beta$ -catenin in ductal cells of irradiated mice  
204 relative to controls (Fig4D-v), suggesting ongoing tissue remodeling activity (25, 27, 28). In  
205 addition, we performed immunostaining of NKCC1, a cotransporter highly expressed in baso-  
206 lateral membrane of acinar cells. We observed reduced expression of NKCC1 in submandibular  
207 glands of irradiated mice when compared to controls (Fig4D-vi). However, we did not observe  
208 any changes in NKCC1 expression in parotid and sublingual glands in irradiated and control  
209 mice.

210 The advantages of developing precision-IR based female NSG-GSM3 as a chronic  
211 hyposalivation model for preclinical testing are manifold. *Animal:* These mice express human  
212 interleukin-3 (hIL3), human granulocyte monocyte colony stimulating factor (hGM-CSF) and  
213 human c-Kit ligand also known as human stem cell factor (hSCF), which makes them ideal to  
214 study the regenerative properties of c-KIT-expressing putative human salivary stem cells (10).  
215 Male NSG-SGM3 mice, like other rodents (23, 29), have granular convoluted tubular structures

216 which are absent in human. Both young and old female mice are suitable models, but young  
217 female mice will perhaps offer quicker test results. The earliest post-IR timepoint which indicates  
218 stabilization of flow rate fluctuations in these female mice are around 2 months post-irradiation.  
219 We recommend this as the earliest timepoint to assess chronic hyposalivation levels. *Precision*  
220 *IR*: The presence of *Prkdc<sup>scid</sup>* mutation makes these mice radiosensitive due to the lack of  
221 functional DNA repair machinery (11). Head & neck radiation to overcome this issue may lead to  
222 cognitive and other brain defects (30). Therefore, precision IR enables hyposalivation studies  
223 using 5-7.5 Gy doses over chronic timeline irrespective of gender or age. These mice are  
224 available at Jackson Laboratories and breed well under standard conditions. *Schirmer's test*:  
225 Each strip costs around 0.3US Dollar. Single kinetic measurement of a flow rate over 30  
226 minutes in a single animal requires 6 strips. The reading can be noted real-time or a pencil mark  
227 is sufficient to analyze the strips later with no concerns of evaporation.

228 On the basis of our characterization of immunodeficient NSG-SGM3 mice following brain-  
229 sparing precision IR of salivary glands, we propose a novel chronic hyposalivation model for  
230 regenerative medicine and human cell therapy studies.

## 231 **Methods:**

232 **Animals:** Female and male NOD.Cg-Prkdcscid Il2rgtm1Wjl Tg(CMV-  
233 IL3,CSF2,KITLG)1Eav/MloySzJ mice (8-12 weeks old) were purchased from Jackson  
234 Laboratories and maintained at Mayo Clinic animal facility. Experimental mice were housed in  
235 barrier facility and fed ad libitum with food pellets and acidified water. All procedures were  
236 approved by Mayo Clinic's Institutional Animal Care and Use Committee (IACUC).

237 **Salivary targeted precision IR set-up:** Each mouse was anesthetized via isoflurane for the  
238 duration of the procedure via a nose cone delivery system on a bite block, and placed in a Feet  
239 First Prone (FFP) position in the irradiation chamber. A commercially- available stereotactic  
240 stage (Model 900M, Kopf Instruments, Tujunga, CA) was modified to facilitate mounting to the  
241 X-RAD SmART irradiator (31) (Fig1A). X-ray irradiation (0, 2.5, 5 or 7.5 Gy; at ~5Gy/min dose  
242 rate) using X-RAD SmART irradiator was delivered to head and neck in a brain-sparing manner.  
243 The stereotactic X-RAD SmART irradiator set-up doesn't require additional blocking. In brief,  
244 each mouse was volumetrically imaged with CBCT (60 kVp, 0.3 mA, 2.0 mm Al filter, 256  
245 projections 0.2 mm<sup>3</sup> voxel size). Subsequently, the filter was switched to high energy copper  
246 (irradiation) filter and beam is focused on the target using 10 mm circular collimator for brain-



247 sparing salivary-ablative radiation treatment. Each mouse was under isoflurane anesthesia for  
248 about 10 min to complete the irradiation procedure.

249 ***Pilocarpine-stimulated reflex saliva flow measurements:*** Animals were anesthetized using  
250 2% isoflurane and injected sub-cutaneously with 2 mg/kg pilocarpine, a cholinergic drug. After 5  
251 minutes, animals were restrained and the secreted saliva was collected continuously from the  
252 floor of the mouth using pre-weighed Schirmer's test strips (Tearflo, HUB Pharmaceuticals LLC,  
253 Rancho Cucamonga, CA, USA) for a period of 30 minutes. The strips were changed every five  
254 minutes and the distance of saliva migration under the capillary action (mm) was recorded.  
255 Subsequently, the weight of blotted strips was determined gravimetrically. Saliva was measured  
256 every three weeks interval in all groups of mice for a period of 24 weeks. The rate of saliva  
257 secretion by Schirmer's test and gravimetry was determined in irradiated and sham treated  
258 animals.

259 ***Histology and immunostaining:*** Mouse major salivary glands were fixed in 10% formalin  
260 buffer fixative (fisher scientific; SF-1004) for 1 h prior to processing. Paraffin-embedded salivary  
261 glands tissues sections (5µm thick) were stained with Hematoxylin and Eosin (H&E;  
262 morphological changes), trichrome, and red stain (collagen). Stained slides were photographed  
263 using color brightfield imaging with Cytation5 (BioTek Instruments Agilent Technologies, USA).  
264 For immunostaining, 5 µm sections salivary tissues were deparaffinized with xylene, rehydrated  
265 in graded ethanol and rinsed with distilled water. Slides were rehydrated and antigens retrieved  
266 by boiling slides for 20 minutes in antigen unmasking solution (Vector Laboratories Inc,  
267 Burlingame, CA, USA). Sectioned tissues were incubated overnight at 4°C with desired primary  
268 antibody anti-EpCAM antibody conjugated with Alexa Fluor 488, (Abcam, ab237384 1:200  
269 dilution), anti-NKCC1(Abcam, ab59791; 1;250), anti- Aquaporin-5 (Sigma-Aldrich, AB15858,  
270 1:200), or anti-β catenin conjugated with Alexa Fluor 647 (Abcam, ab194119; 1;250) diluted in  
271 blocking buffer (2% normal goat serum, 0.1% Triton X-100 in PBS). After three washes in PBS-  
272 Tween 20 (PBST), sections were incubated for 1 h with secondary antibody (Alexa Fluor® 488  
273 goat anti-rabbit IgG (ThermoFisher Scientific, A-11008, 1:200), or Alexa Fluor® 594 goat anti-  
274 rabbit IgG (ThermoFisher Scientific, A-11012, 1:200) diluted in PBS, containing 2% normal goat  
275 serum. Nuclei were counterstained with DAPI Fluoromount-G® (Southern Biotech, Birmingham,  
276 AL, USA).

277 ***Statistical Analysis:*** Analyses were performed using GraphPad Prism 8.0. For parameteric  
278 comparisons between treated and untreated groups, an unpaired two-tailed Student's t-test was

279 utilized. P-values of < 0.05 were considered significant. Multiple group comparison was  
280 performed by one-way or two-way ANOVA. Differences were considered significant at  $P < 0.05$ .  
281 Results are reported as mean  $\pm$  SEM unless otherwise stated.

282 **Contributions:** SA and IV conducted experiments and analyzed the results, performed  
283 statistical analysis, and wrote the manuscript. ET, MW and JS assisted with SmART technology  
284 and stereotactic radiotherapy design and dosimetry. JS, XX and CE assisted with data  
285 collection. RS and JG assisted with interpretation of histology and immunohistochemistry data.  
286 IV performed statistical analysis. IL provided insight on current saliva collection methods. JJ and  
287 NK conceptualized and designed the study, interpreted the data, and wrote the manuscript. NK  
288 supervised the study. All authors contributed to the drafting of the manuscript.

289 **Acknowledgments:** This study was supported by Mayo Clinic and in part by grants to JJ and  
290 NK from Mayo Clinic Center for Regenerative Medicine. We thank Dr. James E. Melvin  
291 (NIH/NIDCR) for helpful discussions on salivary measurement methods, and Drs. Geng Xian  
292 Shi and Gang Liu for their technical assistance.

### 293 **References:**

- 294 1. Siegel RL, Miller KD, and Jemal A. Cancer Statistics, 2017. *CA: a cancer journal for*  
295 *clinicians*. 2017;67(1):7-30.
- 296 2. Vissink A, Burlage FR, Spijkervet FK, Jansma J, and Coppes RP. Prevention and  
297 treatment of the consequences of head and neck radiotherapy. *Critical reviews in oral*  
298 *biology and medicine : an official publication of the American Association of Oral*  
299 *Biologists*. 2003;14(3):213-25.
- 300 3. Sun HB, Gao XJ, Deng J, Li NY, and Lu HJ. Progress of oral sequelae during head-neck  
301 radiotherapy. *The Chinese journal of dental research : the official journal of the Scientific*  
302 *Section of the Chinese Stomatological Association*. 2010;13(1):51-5.
- 303 4. Villa A, Connell CL, and Abati S. Diagnosis and management of xerostomia and  
304 hyposalivation. *Ther Clin Risk Manag*. 2015;11:45-51.
- 305 5. Takakura AC, Moreira TS, Laitano SC, De Luca Junior LA, Renzi A, and Menani JV.  
306 Central muscarinic receptors signal pilocarpine-induced salivation. *J Dent Res*.  
307 2003;82(12):993-7.

- 308 6. Chambers MS, Jones CU, Biel MA, Weber RS, Hodge KM, Chen Y, et al. Open-label,  
309 long-term safety study of cevimeline in the treatment of postirradiation xerostomia. *Int J*  
310 *Radiat Oncol Biol Phys*. 2007;69(5):1369-76.
- 311 7. Lombaert IM, Brunsting JF, Wierenga PK, Faber H, Stokman MA, Kok T, et al. Rescue  
312 of salivary gland function after stem cell transplantation in irradiated glands. *PLoS One*.  
313 2008;3(4):e2063.
- 314 8. Mishima K, Inoue H, Nishiyama T, Mabuchi Y, Amano Y, Ide F, et al. Transplantation of  
315 side population cells restores the function of damaged exocrine glands through clusterin.  
316 *Stem Cells*. 2012;30(9):1925-37.
- 317 9. Nanduri LS, Lombaert IM, van der Zwaag M, Faber H, Brunsting JF, van Os RP, et al.  
318 Salisphere derived c-Kit+ cell transplantation restores tissue homeostasis in irradiated  
319 salivary gland. *Radiother Oncol*. 2013;108(3):458-63.
- 320 10. Pringle S, Maimets M, van der Zwaag M, Stokman MA, van Gosliga D, Zwart E, et al.  
321 Human Salivary Gland Stem Cells Functionally Restore Radiation Damaged Salivary  
322 Glands. *Stem Cells*. 2016;34(3):640-52.
- 323 11. Wunderlich M, Chou FS, Link KA, Mizukawa B, Perry RL, Carroll M, et al. AML xenograft  
324 efficiency is significantly improved in NOD/SCID-IL2RG mice constitutively expressing  
325 human SCF, GM-CSF and IL-3. *Leukemia*. 2010;24(10):1785-8.
- 326 12. Verhaegen F, Granton P, and Tryggestad E. Small animal radiotherapy research  
327 platforms. *Phys Med Biol*. 2011;56(12):R55-83.
- 328 13. Stewart JM, Ansell S, Lindsay PE, and Jaffray DA. Online virtual isocenter based  
329 radiation field targeting for high performance small animal microirradiation. *Phys Med*  
330 *Biol*. 2015;60(23):9031-46.
- 331 14. Clarkson R, Lindsay PE, Ansell S, Wilson G, Jelveh S, Hill RP, et al. Characterization of  
332 image quality and image-guidance performance of a preclinical microirradiator. *Med*  
333 *Phys*. 2011;38(2):845-56.
- 334 15. Smith EJ, Tryggestad EJ, Carlson BL, Walb MC, and Sarkaria JN. Imaging and  
335 Dosimetry Study of Inter-fraction Setup Error in a Murine Xenograft Flank Tumor  
336 Radiation Model. *Radiat Res*. 2020;193(2):161-70.
- 337 16. van Hoof SJ, Granton PV, and Verhaegen F. Development and validation of a treatment  
338 planning system for small animal radiotherapy: SmART-Plan. *Radiother Oncol*.  
339 2013;109(3):361-6.
- 340 17. Rogers DW, Faddegon BA, Ding GX, Ma CM, We J, and Mackie TR. BEAM: a Monte  
341 Carlo code to simulate radiotherapy treatment units. *Med Phys*. 1995;22(5):503-24.

- 342 18. Nicolini FE, Cashman JD, Hogge DE, Humphries RK, and Eaves CJ. NOD/SCID mice  
343 engineered to express human IL-3, GM-CSF and Steel factor constitutively mobilize  
344 engrafted human progenitors and compromise human stem cell regeneration. *Leukemia*.  
345 2004;18(2):341-7.
- 346 19. Proctor GB. The physiology of salivary secretion. *Periodontol 2000*. 2016;70(1):11-25.
- 347 20. Nanduri LS, Maimets M, Pringle SA, van der Zwaag M, van Os RP, and Coppes RP.  
348 Regeneration of irradiated salivary glands with stem cell marker expressing cells.  
349 *Radiother Oncol*. 2011;99(3):367-72.
- 350 21. Gilman KE, Camden JM, Klein RR, Zhang Q, Weisman GA, and Limesand KH. P2X7  
351 receptor deletion suppresses gamma-radiation-induced hyposalivation. *Am J Physiol*  
352 *Regul Integr Comp Physiol*. 2019;316(5):R687-R96.
- 353 22. Senchyna M, and Wax MB. Quantitative assessment of tear production: A review of  
354 methods and utility in dry eye drug discovery. *J Ocul Biol Dis Infor*. 2008;1(1):1-6.
- 355 23. Maruyama CL, Monroe MM, Hunt JP, Buchmann L, and Baker OJ. Comparing human  
356 and mouse salivary glands: A practice guide for salivary researchers. *Oral Dis*.  
357 2019;25(2):403-15.
- 358 24. Grundmann O, Mitchell GC, and Limesand KH. Sensitivity of salivary glands to radiation:  
359 from animal models to therapies. *J Dent Res*. 2009;88(10):894-903.
- 360 25. Maimets M, Rocchi C, Bron R, Pringle S, Kuipers J, Giepmans BN, et al. Long-Term In  
361 Vitro Expansion of Salivary Gland Stem Cells Driven by Wnt Signals. *Stem Cell Reports*.  
362 2016;6(1):150-62.
- 363 26. Hosoi K, Yao C, Hasegawa T, Yoshimura H, and Akamatsu T. Dynamics of Salivary  
364 Gland AQP5 under Normal and Pathologic Conditions. *Int J Mol Sci*. 2020;21(4).
- 365 27. Hai B, Yang Z, Millar SE, Choi YS, Taketo MM, Nagy A, et al. Wnt/beta-catenin signaling  
366 regulates postnatal development and regeneration of the salivary gland. *Stem Cells Dev*.  
367 2010;19(11):1793-801.
- 368 28. Hai B, Yang Z, Shanguan L, Zhao Y, Boyer A, and Liu F. Concurrent transient  
369 activation of Wnt/beta-catenin pathway prevents radiation damage to salivary glands. *Int*  
370 *J Radiat Oncol Biol Phys*. 2012;83(1):e109-16.
- 371 29. Gresik EW. The granular convoluted tubule (GCT) cell of rodent submandibular glands.  
372 *Microsc Res Tech*. 1994;27(1):1-24.
- 373 30. Zer A, Pond GR, Razak ARA, Tirona K, Gan HK, Chen EX, et al. Association of  
374 Neurocognitive Deficits With Radiotherapy or Chemoradiotherapy for Patients With Head  
375 and Neck Cancer. *JAMA Otolaryngol Head Neck Surg*. 2018;144(1):71-9.

- 376 31. Walb MC, Carlson BL, Sarkaria JN, and Tryggestad EJ. Quantifying the setup  
377 uncertainty of a stereotactic murine micro-image guided radiation therapy system. *Br J*  
378 *Radiol.* 2019;92(1095):20180487.

379

380 **Figure Legends**

381 **Figure 1. Effects of CBCT-guided stereotactic salivary-ablative precision IR on aging**  
382 **highly immunodeficient and partially humanized NSG-SGM3 mice.** A) A photograph  
383 showing a dummy mouse restrained on stereotactic stage of the X-RAD SmART irradiator. B)  
384 Dosimetry and angle of delivery calculated using vendor supplied Monte Carlo treatment  
385 planning system. C) Representative images showing CBCT-guided target placement at the  
386 midline of the mouse neck region; (i) axial, (ii) sagittal, and (iii) temporal views. D)  
387 Representative head and neck image highlighting chronic alopecia in neck region associated  
388 with 0, 2.5, 5 and 7.5 Gy IR (female; n=5 for each group). E) Body weight (in grams) and age (in  
389 months) of NSG-SGM3 mice used in this study; male (n=19), female (n=20) and old female  
390 (n=20). F) Long-term survival plot in young mice showing lack of precision radiation associated  
391 mortality (male n=19; female n=20).

392 **Figure 2. Objective and instantaneous assessment of pilocarpine-stimulated reflex saliva**  
393 **flow in preclinical NSG-SGM3 model.** A) Illustration of workflow to measure pilocarpine-  
394 stimulated reflex saliva flow by Schirmer's test strips and gravimetry. B) Kinetics of pilocarpine-  
395 stimulated reflex saliva flowrate ( $\mu\text{g}/\text{min}$ ) in NSG-SGM3 mice (male (n=5), female (n=5) and old  
396 female (n=4). C) Barplot showing gender and age differences in saliva flowrate at 10 and 25  
397 mins post-stimulation male (n=5), female (n=5) and old female (n=4). C) X-Y plot showing  
398 correlation between gravimetric vs Schirmer's test method based detection of pilocarpine-  
399 stimulated reflex saliva fraction in male and female mice (male (n=19) ; female (n=20); \*denotes  
400  $p<0.01$ .

401 **Figure 3. Effects of precision IR doses on chronic hyposalivation in preclinical NSG-**  
402 **SGM3 model.** A) Kinetics of pilocarpine-stimulated reflex saliva flow rate ( $\mu\text{g}/\text{min}$ ) in mice  
403 treated with different precision IR doses (male (n=5 all groups except for 7.5Gy IR dose n=4);  
404 female n=5 or n=4 old female for each experimental group). B) Gender -and age-specific  
405 significant differences in pilocarpine-stimulated reflex saliva fraction in mice treated with  
406 different precision IR doses. Data is relative to respective sham treated controls (male (n=5 all  
407 groups except for 7.5Gy IR dose n=4); female n=5 or old female n=4 for each experimental  
408 group). C) High-dose precision irradiated mice displaying delayed onset of stimulated reflex  
409 saliva flowrate in time (0, 2, 4, 6 months) (male (n=5 all groups except for 7.5Gy IR dose n=4;  
410 female n=5 or old female n=4 for each experimental group). D) Barplot showing significant  
411 changes in saliva fraction at +3, +6, and +24 weeks in irradiated young male, female and old



412 female mice relative 0 Gy controls (male (n=5 all groups except for 7.5Gy IR dose n=4; female  
413 n=5 or old female n=4 for each experimental group.\*p<0.01; \*\*p<0.001 and \*\*\*p<0.0001

414 **Figure 4. Assessment at necropsy reveals 6 month post-precision IR associated changes**  
415 **on salivary tissue, stroma, epithelial cell polarity, and integrity in preclinical NSG-SGM3**

416 **model. A)** Barplot showing baseline differences in wet weight of total salivary gland tissue  
417 (mg/g body weight) obtained from mice at the time of necropsy (male n=19; female n=20 or old  
418 female n=20. **B)** Representative photo micrograph illustrating precision 7.5 IR induced total  
419 salivary tissue volume reduction at necropsy compared to sham treated control young female  
420 mouse. **C)** X-Y plot showing precision IR dose dependent changes in the body weight adjusted  
421 wet weight of total salivary tissue in mg (male n=5 except n=4 for 7.5Gy IR dose; female n=5 or  
422 old female n=4 for each experimental group. **D)** Photomicrograph of stained parotid,  
423 submandibular and sublingual glands of young female NSG-GM3 mice at 6 month post-IR (0  
424 and 7.5 Gy). Five micron sections were stained with (i) H&E, (ii) Sirius red, (iii) Trichrome, (iv)  
425 EpCAM (v) Aquaporin 5/beta-catenin and (vi) NKCC1 (female n=3). ns denotes not significant;  
426 \*\*p<0.001.

Figure 1

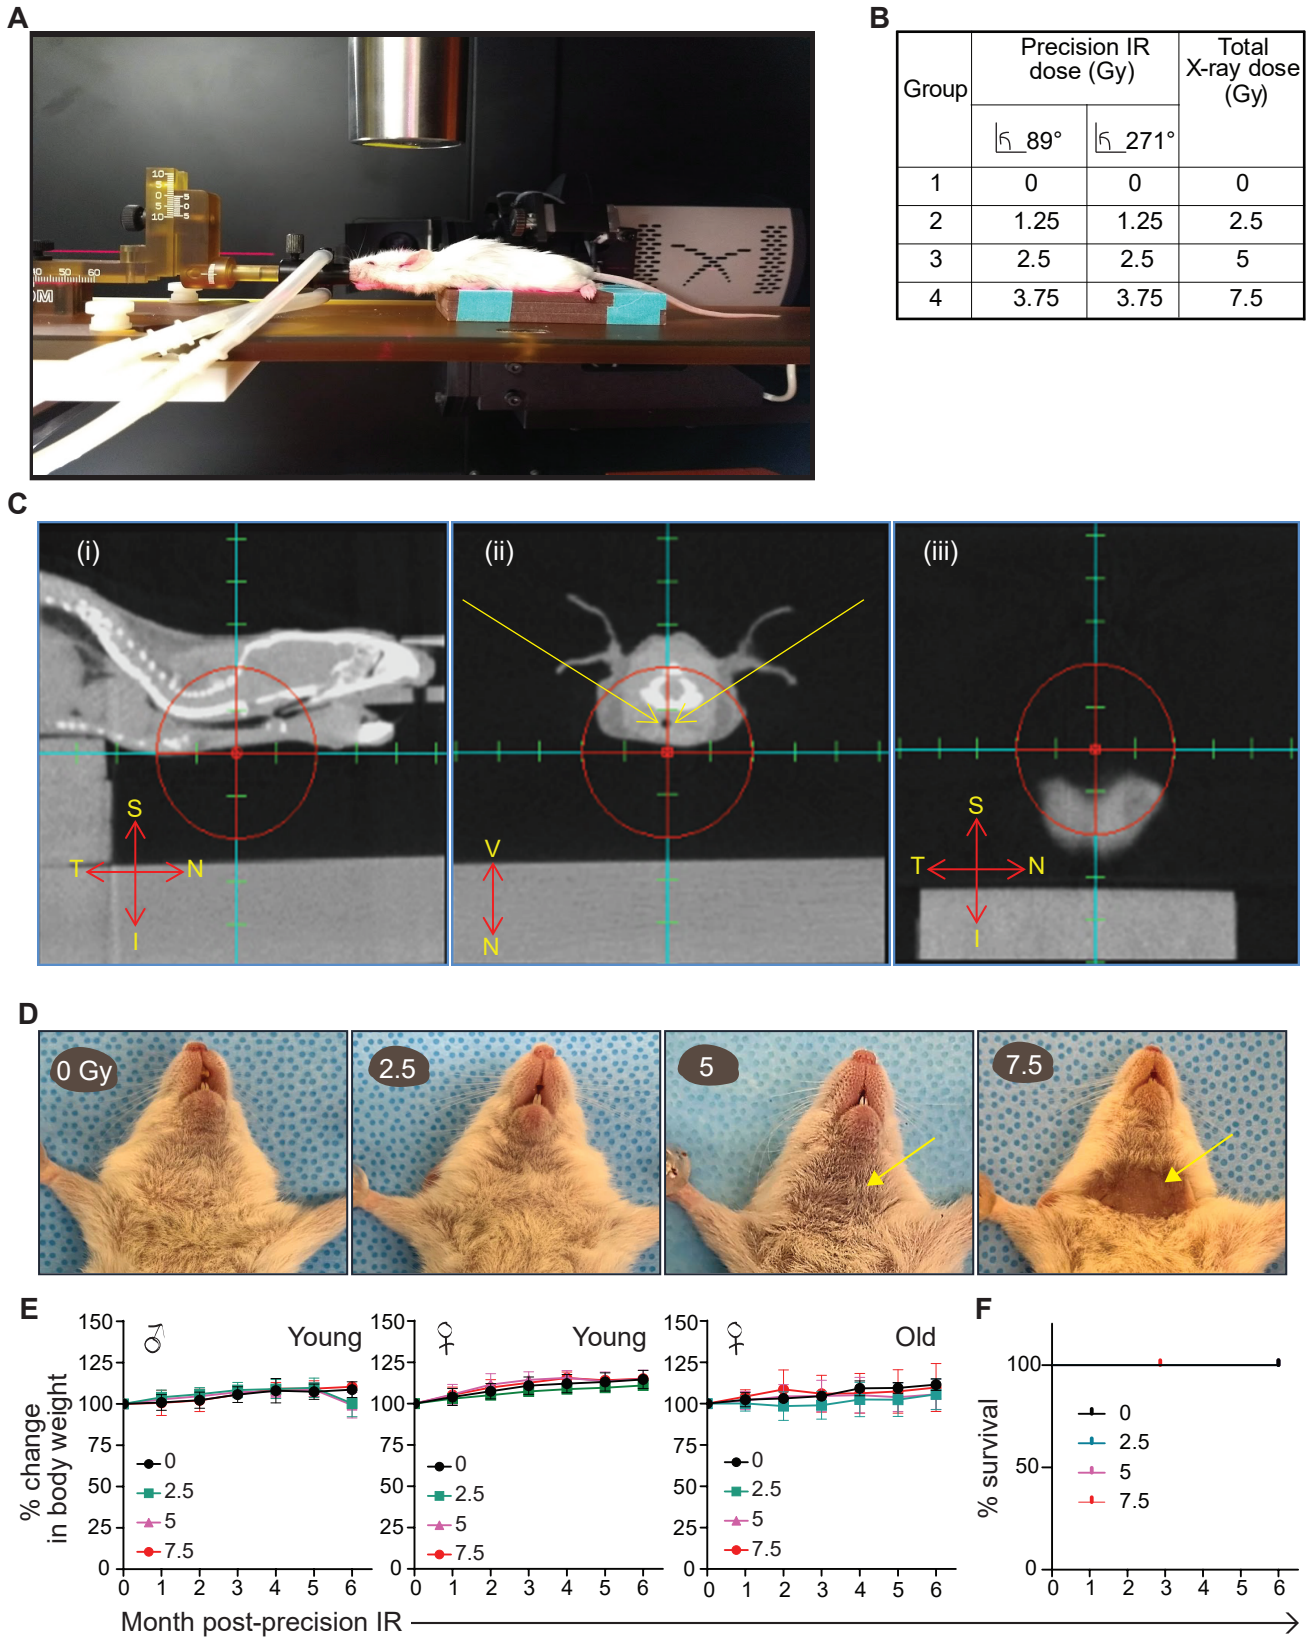

Figure 2

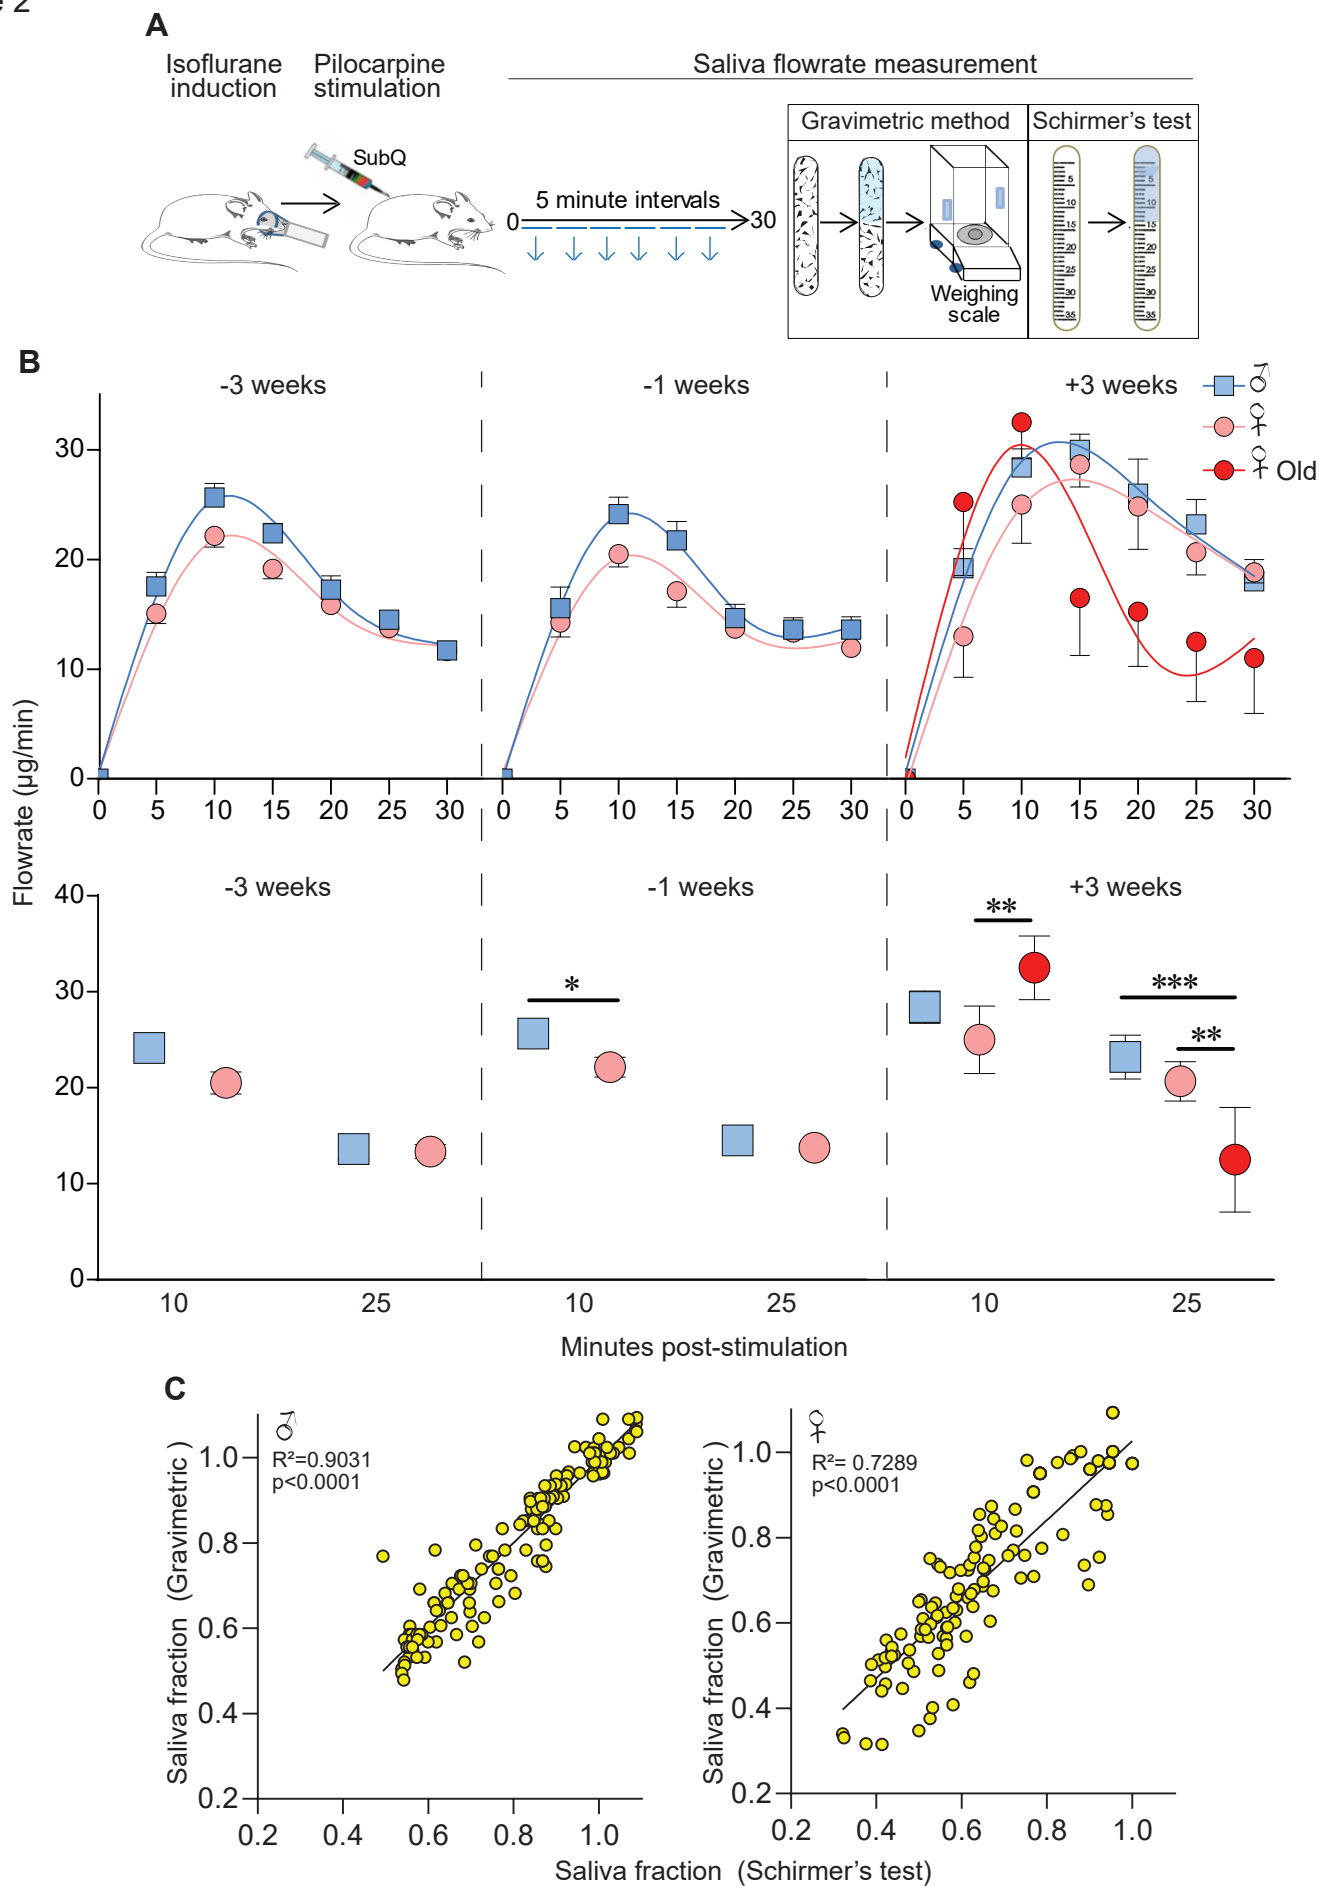

Figure 3

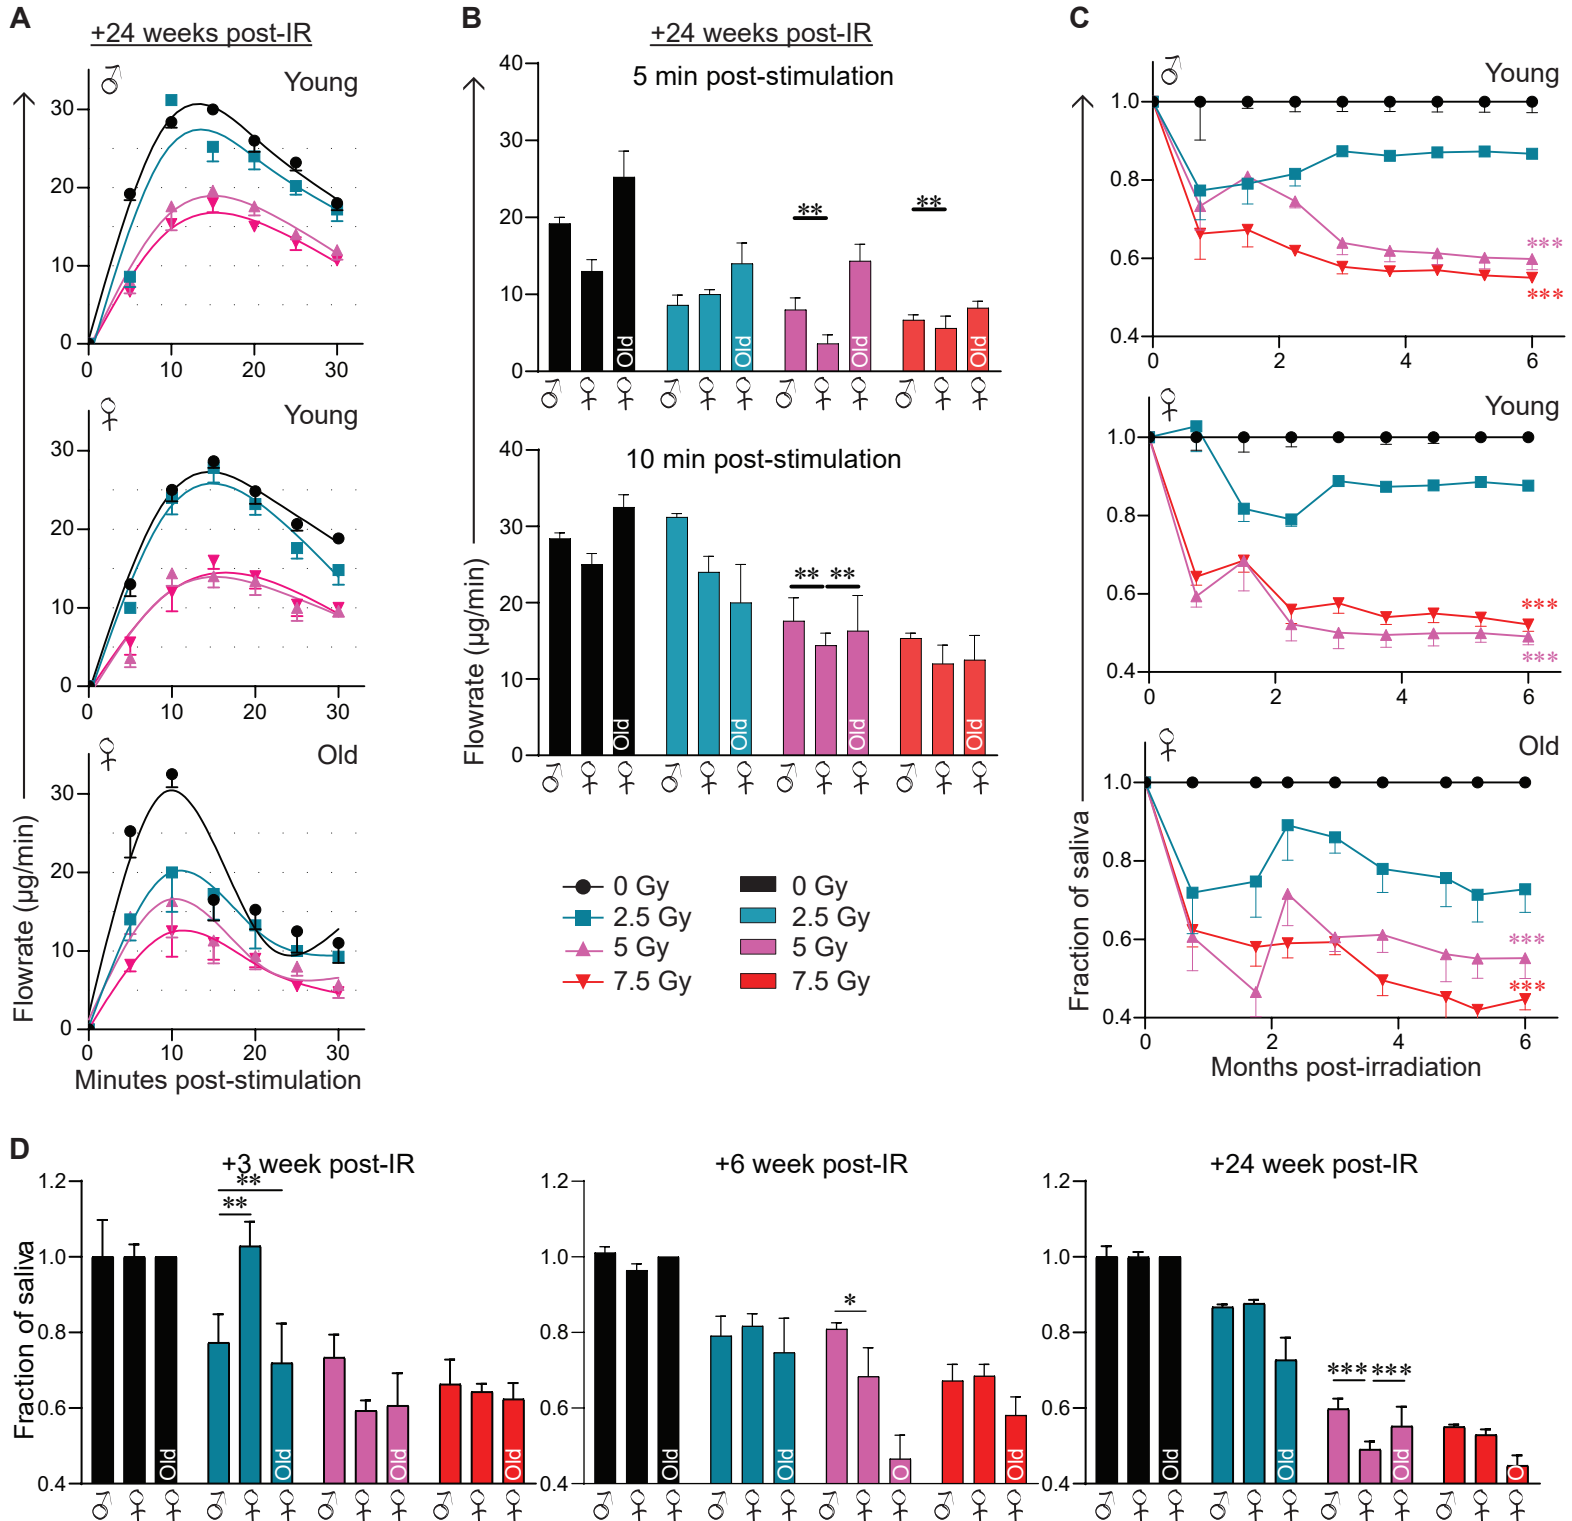



Figure 4

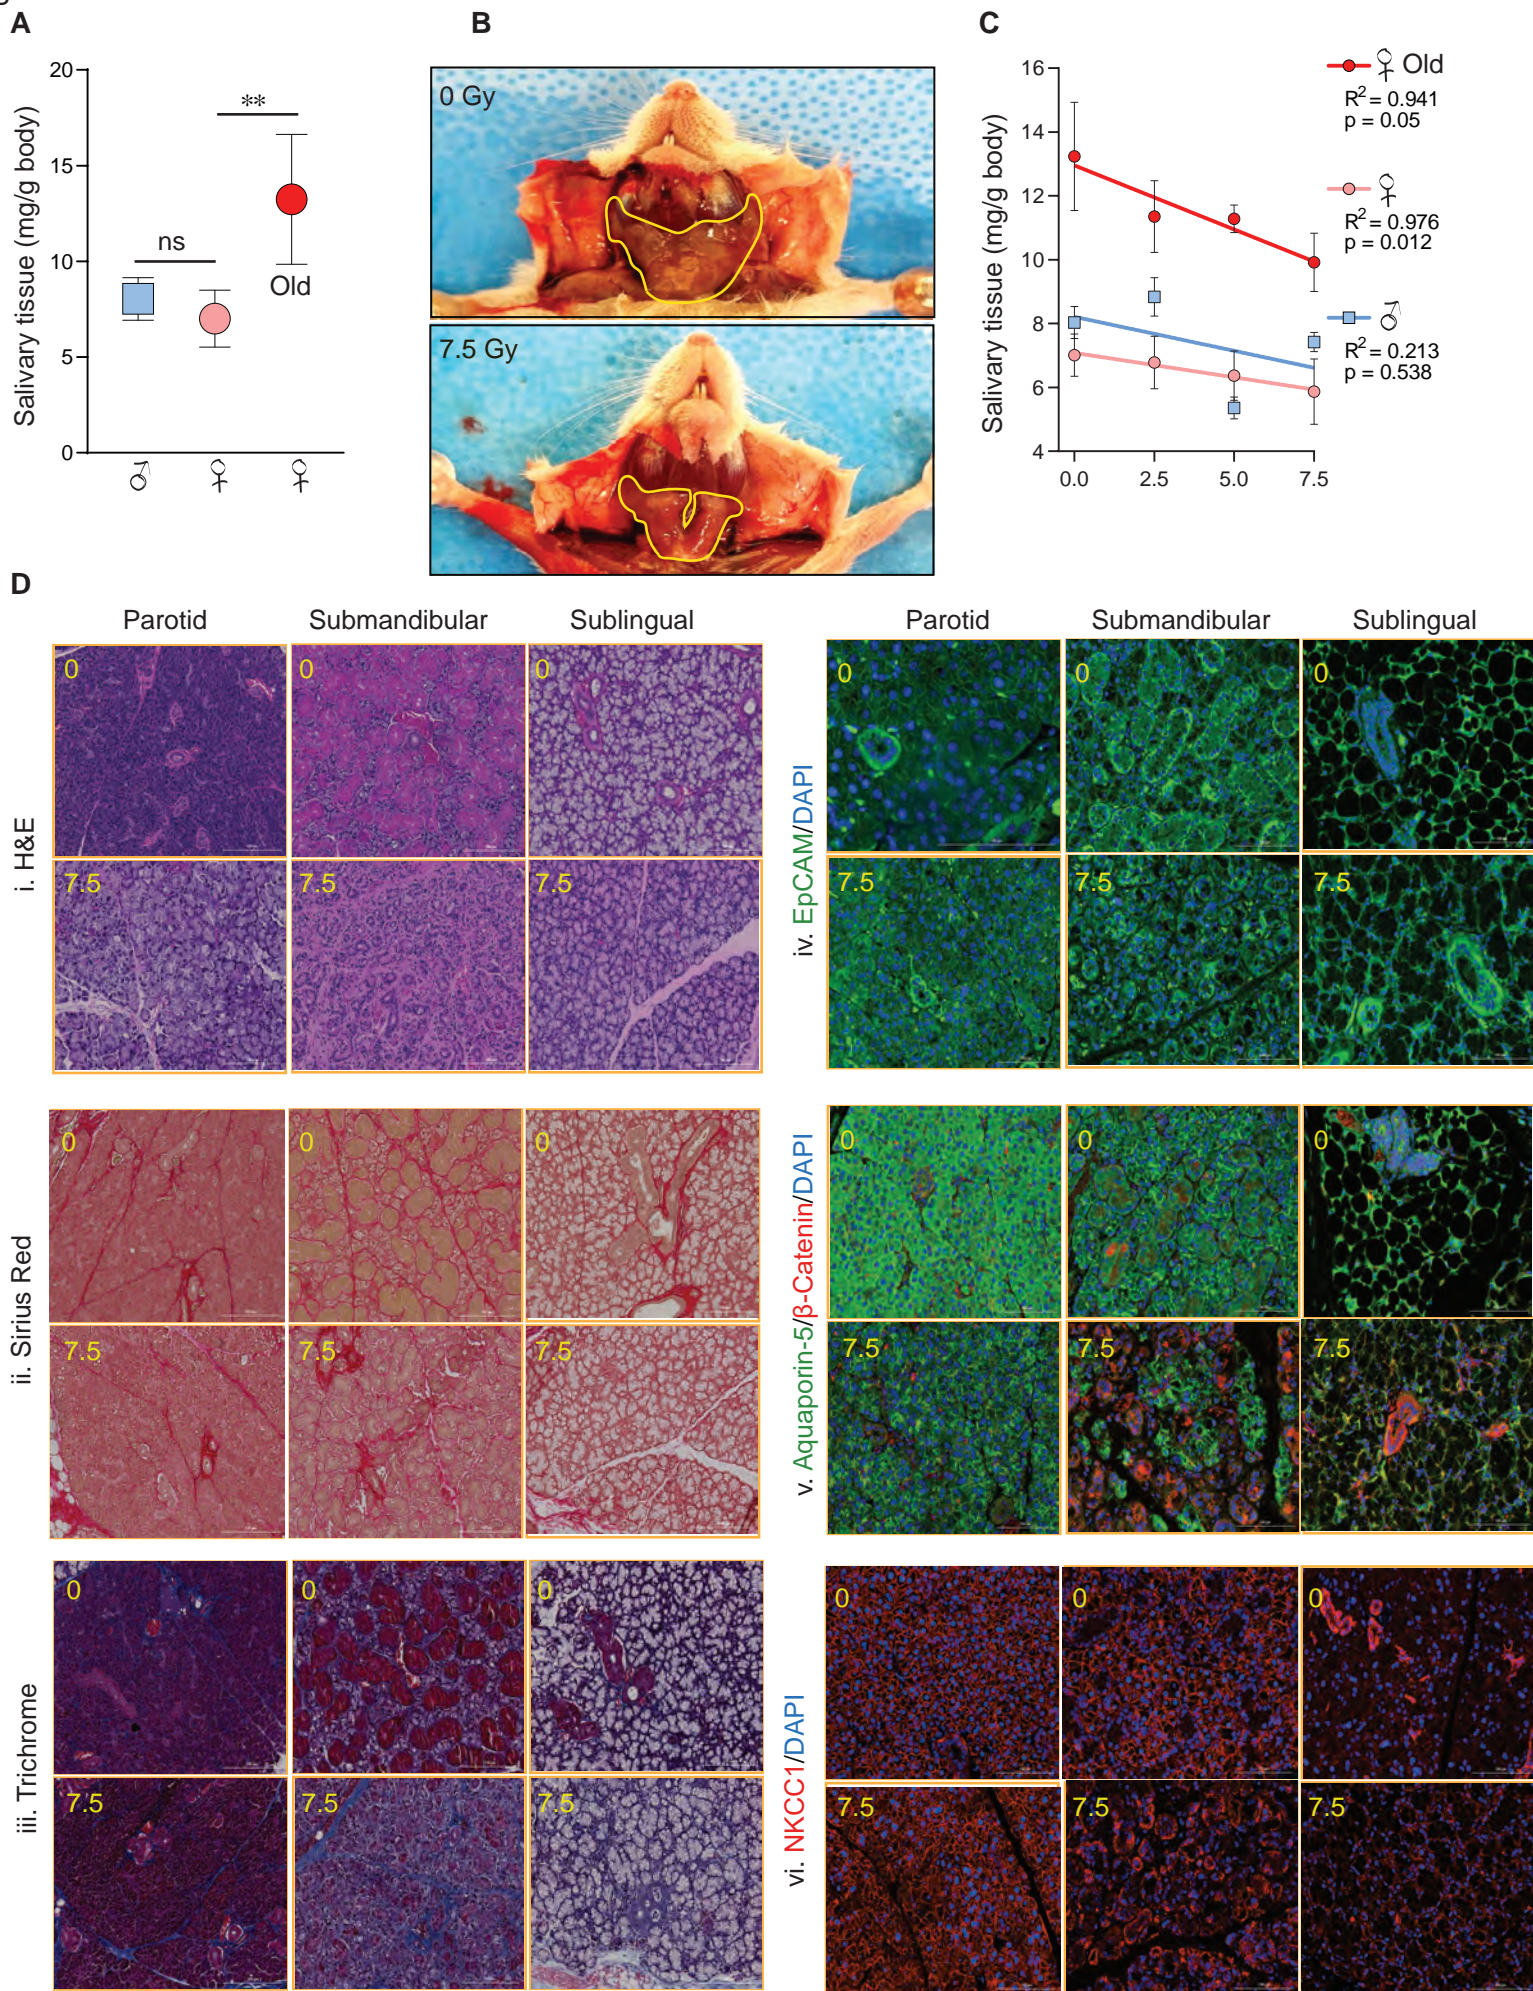

Source: https://www.biorxiv.org/content/10.1101/2020.05.26.117937v1.full.pdf
